# Supplementary material for: Long COVID following Mild SARS-CoV-2 Infection: Characteristic T Cell Alterations and Response to Antihistamines
Source: HighWire-hosted journal article supplement (doi:10.1136/jim-2021-002051), 2021-10-05
Supplement: jim-2021-002051supp001_data_supplement.pdf [file jim-2021-002051supp001_data_supplement.pdf]

Supplemental Figure 1

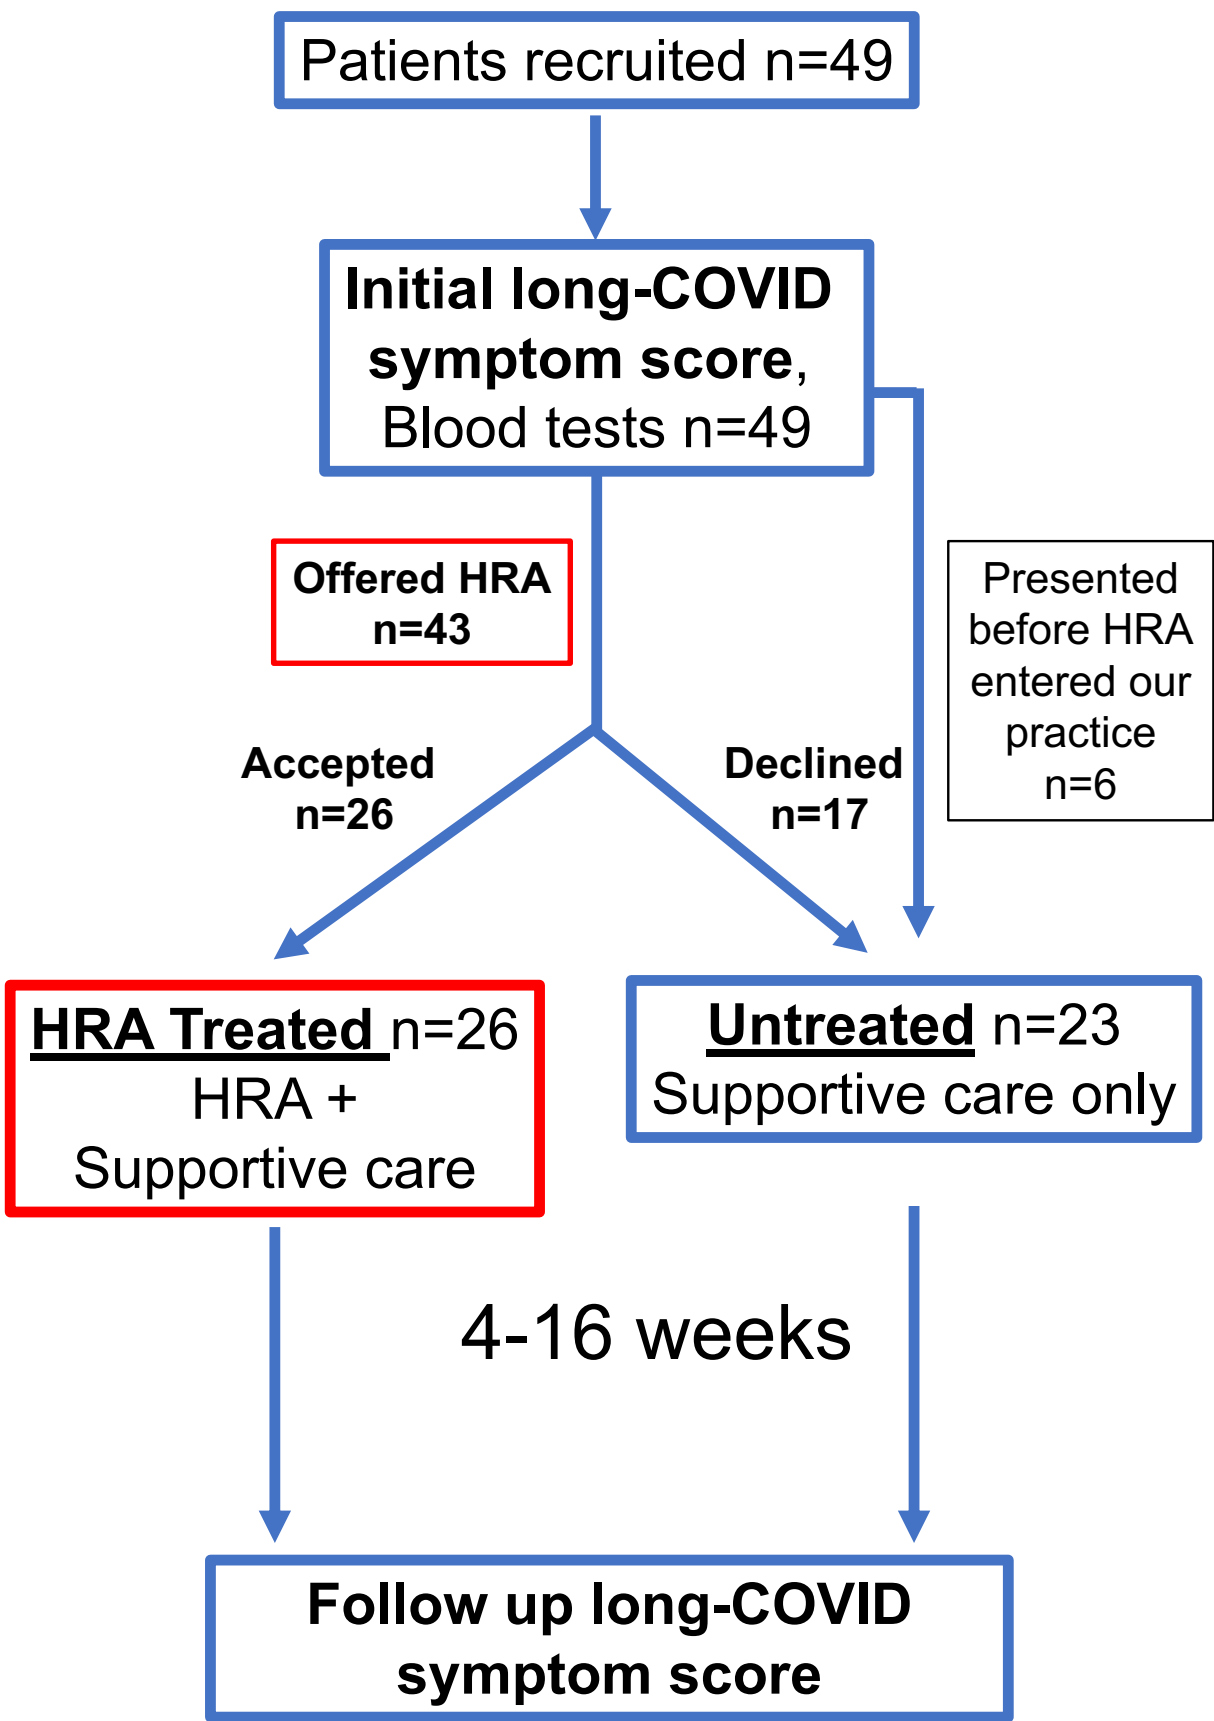

Supplemental Figure 1  
Flow chart showing study design

Supplemental Figure 2

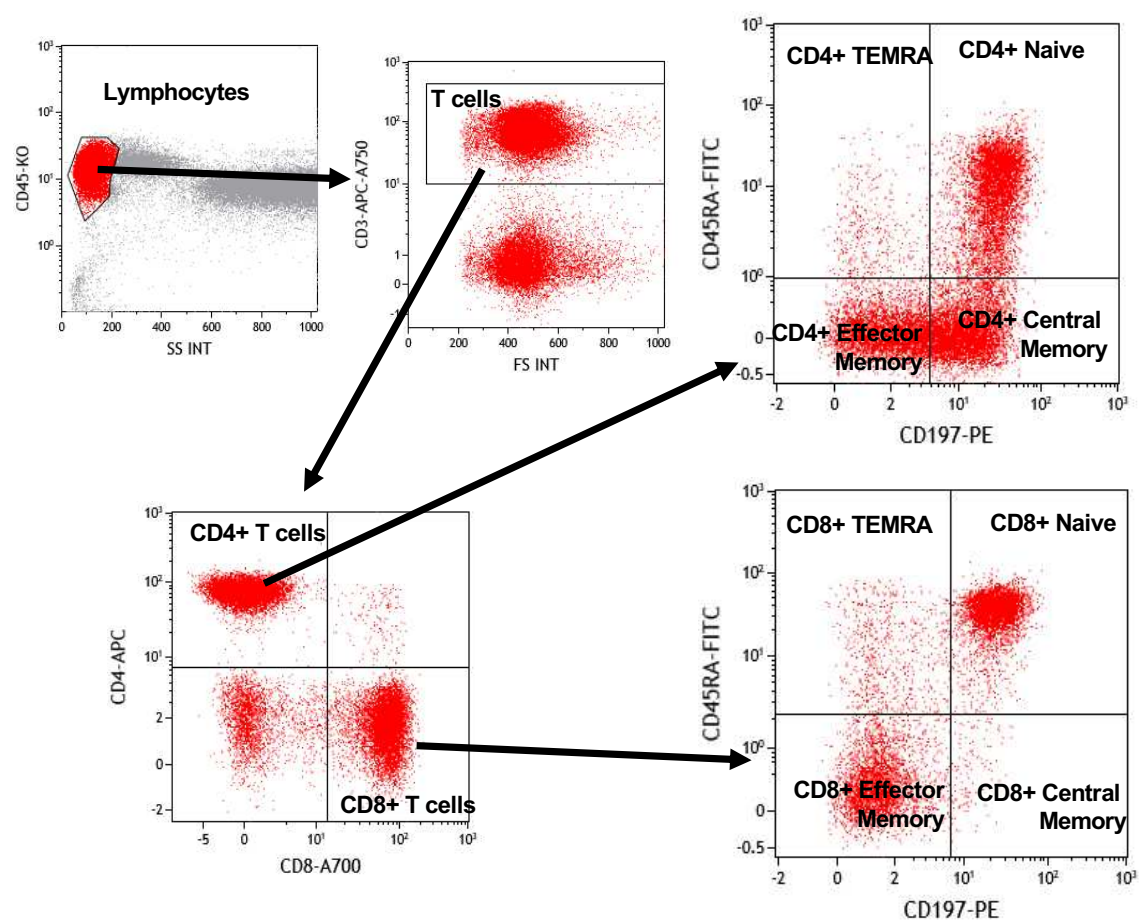

**Supplemental Figure 2**  
Gating strategy used to identify T cell compartments

Supplemental Figure 3

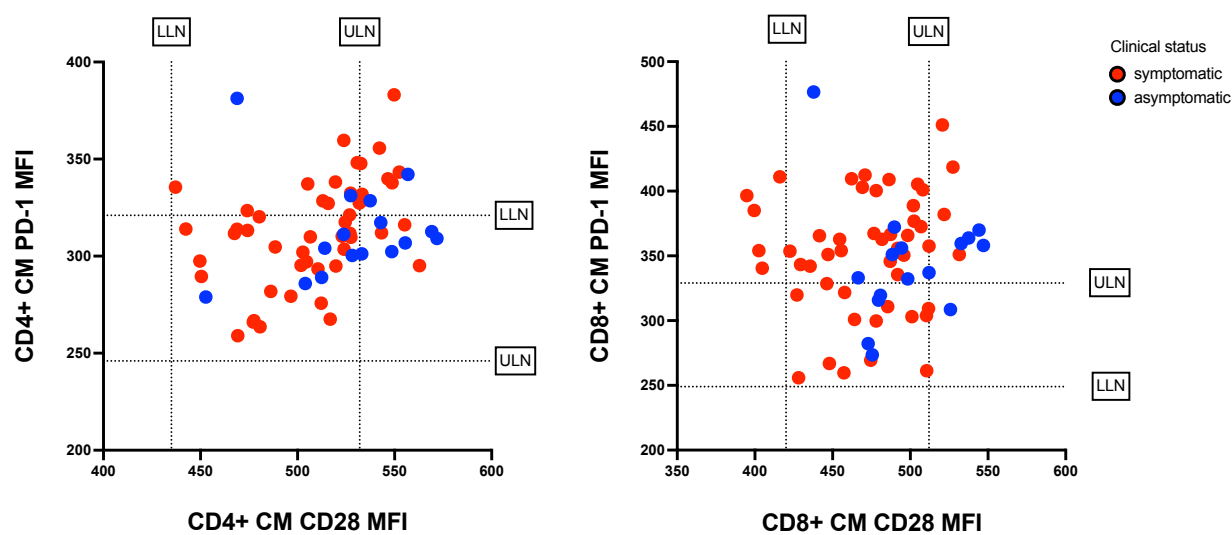

**Supplemental Figure 3**  
Scatter plots showing CD28 and PD1 antigen density in CD4+ (left) and CD8+ EM cells following mild COVID-19. Symptomatic (Long-COVID) and asymptomatic recovered group as indicated. ULN, upper limit of normal. LLN, lower limit of normal.

Supplemental figure 4

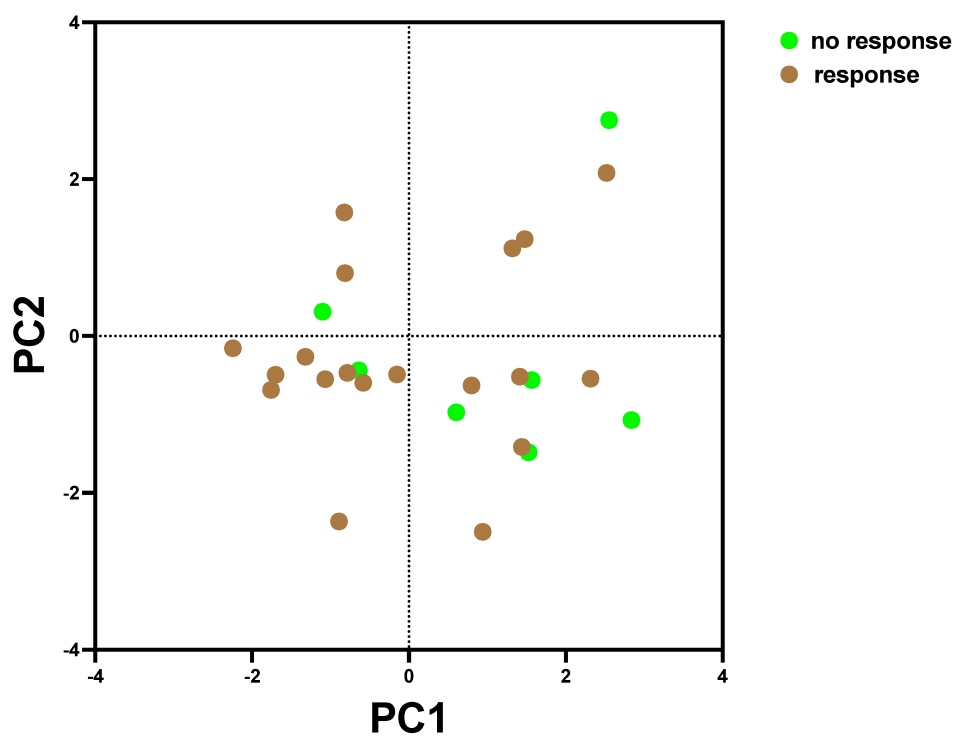

**Supplemental Figure 4**

Principal component analysis (PCA) of CD4+EM, CD8+EM, and CD4+CM and CD8+CM antigen densities of PD1 and CD28 in in long-COVID patients who did (brown circles) and did not respond to HRA (green).
